# Supplementary material for: Architecture-Promoted Biomechanical Performance-Tuning of Tissue-Engineered Constructs for Biological Intervertebral Disc Replacement
Source: MDPI journal article supplement (doi:10.3390/ma14102692), 2021-05-20
Supplement: s1 [file s1]

# Architecture-Promoted Biomechanical Performance-Tuning of Tissue-Engineered Constructs for Biological Intervertebral Disc Replacement

Gernot Lang <sup>1</sup>, Katja Obri <sup>2</sup>, Babak Saravi <sup>1,3</sup>, Aldo R. Boccaccini <sup>2</sup>, Anton Fröh <sup>4</sup>, Michael Seidenstücker <sup>4</sup>, Bodo Kurz <sup>5</sup>, Hagen Schmal <sup>1</sup> and Bernd Rolauffs <sup>1,4,\*</sup>

<sup>1</sup> Department of Orthopedics and Trauma Surgery, Medical Center-Albert-Ludwigs-University of Freiburg, Faculty of Medicine, Albert-Ludwigs-University of Freiburg, Hugstetterstrasse 55, 79106 Freiburg, Germany; gernot.michael.lang@uniklinik-freiburg.de (G.L.); babak.saravi@jupiter.uni-freiburg.de (B.S.); hagen.schmal@uniklinik-freiburg.de (H.S.)

<sup>2</sup> Institute of Biomaterials, Department of Material Science and Engineering, Friedrich-Alexander University of Erlangen-Nürnberg, Cauerstraße 6, 91058 Erlangen, Germany; katja.glier@web.de (K.O.); aldo.boccaccini@ww.uni-erlangen.de (A.R.B.)

<sup>3</sup> AO Research Institute Davos, AO Foundation, Clavadelerstrasse 8, 7270 Davos, Switzerland

<sup>4</sup> G.E.R.N. Research Center for Tissue Replacement, Regeneration & Neogenesis, Department of Orthopedics and Trauma Surgery, Medical Center-Albert-Ludwigs-University of Freiburg, Faculty of Medicine, Albert-Ludwigs-University of Freiburg, Engesserstr 4, 79108 Freiburg im Breisgau, Germany; antonfrueh@aol.com (A.F.); michael.seidenstuecker@uniklinik-freiburg.de (M.S.)

<sup>5</sup> Department of Anatomy, Christian-Albrechts-University, Otto-Hahn-Platz 8, 24118 Kiel, Germany; bkurz@anat.uni-kiel.de

\* Correspondence: berndrolauffs@googlemail.com; Tel.: +49-761-270-26101

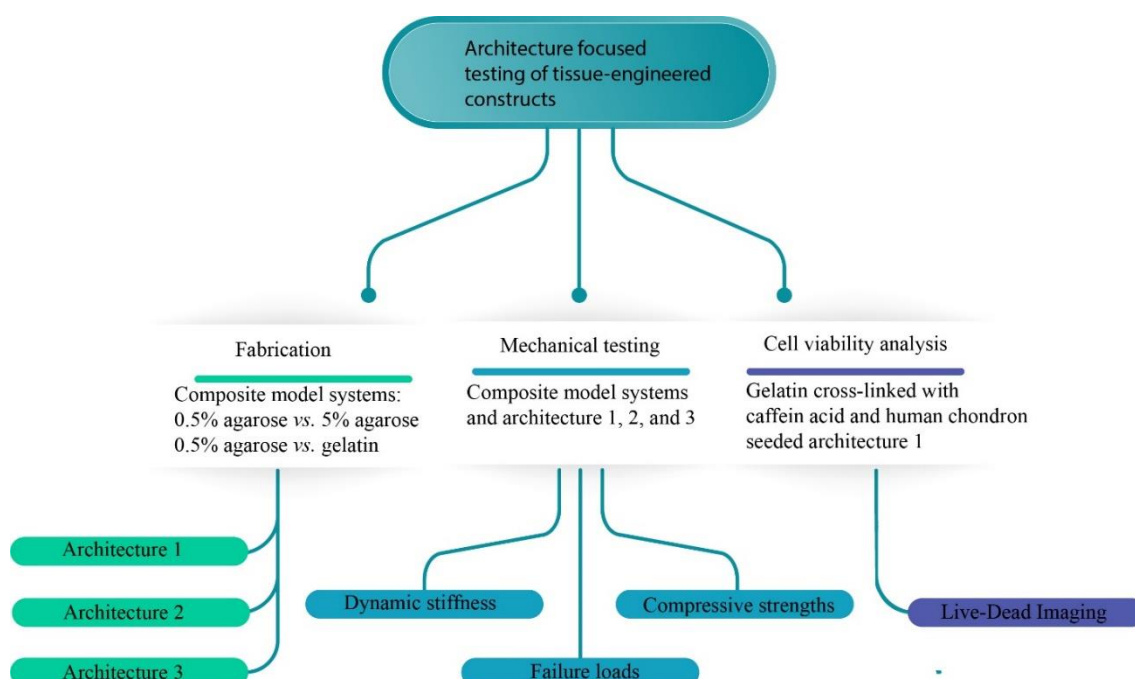

Figure S1. Experimental Setup.

**Table S1.** Composition of the 3D-life hydrogel.

| Solution                 | Concentration                             | Volume [ $\mu$ L] |
|--------------------------|-------------------------------------------|-------------------|
| H <sub>2</sub> O         |                                           | 1.5               |
| buffer solution (pH 5.5) |                                           | 2.5               |
| mal-Dextran              |                                           | 5                 |
| SH-peptide               |                                           | 10                |
| cell suspension          | 16x10 <sup>6</sup> cells mL <sup>-1</sup> | 5                 |
| PEG-Link                 |                                           | 6                 |

**Table S2.** Composition of the reagents for the 3D-life hydrogel.

| Reagent           | Composition                                                                                                    |
|-------------------|----------------------------------------------------------------------------------------------------------------|
| Mal-Dextran       | 30 mmol L <sup>-1</sup> maleimide groups on dextran                                                            |
|                   | 5 mmol L <sup>-1</sup> phosphate buffer                                                                        |
| PEG-link          | 20 mmol L <sup>-1</sup> thiol groups on PEG                                                                    |
|                   | 10 g L <sup>-1</sup> glucose                                                                                   |
|                   | 0.5 mol L <sup>-1</sup> 2-(N-morpholino)ethanesulfonic acid (MES)                                              |
|                   | 0.05 mol L <sup>-1</sup> K Cl                                                                                  |
|                   | 1.1 mol L <sup>-1</sup> NaCl                                                                                   |
| buffer (pH = 5.5) | 0.2 mol L <sup>-1</sup> NaH <sub>2</sub> PO <sub>4</sub> 0.2 g L <sup>-1</sup> phenol red pH-adjusted with HCl |
| cell suspension   | chondrons in PBS (16 × 10 <sup>6</sup> cells mL <sup>-1</sup> )                                                |
| water             | H <sub>2</sub> O (cell biology grade)                                                                          |

**Table S3.** Composition of the chondrocyte cultivation medium.

| Solution                                                    | Supplier          | Concentration<br>[mg/mL] | Volume<br>[mL] |
|-------------------------------------------------------------|-------------------|--------------------------|----------------|
| Ham's F12 Nutrient Mix<br>GlutaMax™                         | Life technologies |                          | 250            |
| DMEM high glucose Gluta-<br>Max™                            | Life technologies |                          | 250            |
| Fetal Calf Serum (FCS)                                      | BioChrom          |                          | 50             |
| Penicillin/Streptomycin                                     | SigmaAldrich      |                          | 10             |
| Fungizone antimycotic                                       | Life technologies |                          | 6              |
| L-Ascorbic acid 2-phosphate<br>sesquimagnesium salt hydrate | SigmaAldrich      | 25                       | 0.5            |

**Table S4.** Composition of the digestion solution for chondron isolation.

| <b>Solution</b> | <b>Supplier</b> | <b>Concentration<br/>[u/mL]</b> | <b>Volume<br/>[mL]</b> |
|-----------------|-----------------|---------------------------------|------------------------|
| Dispase 2       | Roche           | 2.4                             | 8                      |
| Collagenase P   | Roche           | 1.5                             | 2                      |

**Table S5.** Composition of the digestion solution for chondrocyte isolation.

| <b>Solution</b>    | <b>Supplier</b> | <b>Concentration<br/>[u/mL]</b> | <b>Volume<br/>[mL]</b> |
|--------------------|-----------------|---------------------------------|------------------------|
| Dispase 2          | Roche           | 2.4                             | 8                      |
| Collagenase XI     | SigmaAldrich    | 1500                            | 2                      |
| Chondrocyte medium |                 |                                 | 8                      |
